# Supplementary material for: Extraction of Collagen Through Fish Waste Fermentation Optimization and Its Cytotoxic Studies on HaCaT Cell Line
Source: Preprints.org preprint supplement (doi:10.20944/preprints202110.0009.v1), 2021-10-01
Supplement: Supplementary file 1 [file supplementary]

**Acknowledgments**

All acclamation and praises are for "Almighty ALLAH". I would like to acknowledge two people. One is late Khan Abul Hossain, a Bangladeshi freedom fighter, my friend, a batchmate of mine from LLB course of Dhaka International University & with whom I spent a lot of time during my research periods. And another person is Md Kabirul Hasan sir, the best teacher of my life until today and his lectures during my preparation for Junior School Certificate (JSC) Exam was a great foundation to start my research work(s). It might be quite impossible for me to do these research(es) for human kind without their inspiration, mental support & support by giving knowledge.
